1 Nitric oxide metabolites during anoxia and reoxygenation in the anoxia-tolerant vertebrate,  
2 *Trachemys scripta*

3

4 Frank B. Jensen<sup>1\*</sup>, Marie N. Hansen<sup>1</sup>, Gabriella Montesanti<sup>1</sup> and Tobias Wang<sup>2</sup>

5

6 <sup>1</sup>*Department of Biology, University of Southern Denmark, DK-5230 Odense M, Denmark,*

7 <sup>2</sup>*Zoophysiology, Department of Biosciences, Aarhus University, DK-8000 Aarhus C, Denmark*

8

9

10 \*author for correspondence: [fbj@biology.sdu.dk](mailto:fbj@biology.sdu.dk)

11

12

13

14 Short title: Anoxia and reoxygenation in turtles

15

16

17 Keywords: anoxia; cytoprotection; nitric oxide; nitrite; reoxygenation

18 **SUMMARY**

19 Moderate elevations of nitrite and nitric oxide (NO) protect mammalian tissues against ischemia  
20 (anoxia)-reperfusion damage by inhibiting mitochondrial electron transport complexes and reducing  
21 the formation of reactive oxygen species (ROS) upon reoxygenation. Crucian carp appears to  
22 exploit this mechanism by up-regulating nitrite and other nitrite/NO metabolites (S-nitroso and iron-  
23 nitrosyl compounds) in several tissues when exposed to anoxia. We investigated whether this is a  
24 common strategy amongst anoxia-tolerant vertebrates by evaluating NO metabolites in red-eared  
25 slider turtles during long-term (9 days) anoxia and subsequent reoxygenation at low temperature, a  
26 situation naturally encountered by turtles in ice-covered ponds. We also measured glutathione in  
27 selected tissues and assessed the impact of anoxia on electrolyte status. Anoxia induced major  
28 increases in [nitrite] in the heart, pectoral muscle and red blood cells, while [nitrite] was maintained  
29 unaltered in brain and liver. Concomitantly, the concentrations of S-nitroso and iron-nitrosyl  
30 compounds increased, showing that nitrite was used to produce NO and to S-nitrosate cellular  
31 molecules during anoxia. The changes were gradually reversed during reoxygenation (1h and 24h),  
32 testifying that the processes were reversible. The increased NO bioavailability occurred in the  
33 absence of nitric oxide synthase activity (due to global anoxia) and may involve mobilization of  
34 internal/external nitrite reservoirs. Our data supports that anoxic up-regulation of nitrite and other  
35 NO metabolites could be a general cytoprotective strategy amongst anoxia-tolerant vertebrates. The  
36 possible mechanisms of nitrite-derived NO and S-nitrosation in protecting cells from destructive  
37  $\text{Ca}^{2+}$  influx during anoxia and in limiting ROS formation during reoxygenation are discussed.

## 38 INTRODUCTION

39 Episodes with suspended oxygen supply followed by reoxygenation represent a major challenge to  
40 animals. Most vertebrates only tolerate brief anoxia periods due to rapid cellular depletion of ATP  
41 and the subsequent failure of ion transporting ATPases to uphold ionic gradients, hence leading to  
42 depolarization, cellular  $\text{Ca}^{2+}$  overload and other destructive events that ultimately cause cell death in  
43 vital organs such as the brain or the heart (Lutz, 1992). Reoxygenation is also problematic, as it is  
44 associated with excessive production of reactive oxygen species (ROS) that damage cells through  
45 protein oxidation and lipid peroxidation (Lefer and Granger, 2000). The consequences of anoxia  
46 and reoxygenation are under intense study in both medical science and comparative physiology.  
47 Medical interest relates to the clinical importance of ischemia-reperfusion events and the search for  
48 therapeutic means to alleviate damage in myocardial infarction or stroke, while comparative  
49 physiologists are intrigued by the mechanisms that enable some animals to cope with extended  
50 periods of oxygen lack in their natural habitat. Anoxia-tolerant vertebrates like crucian carp and  
51 some freshwater turtles are excellent models to reveal how evolution has solved the problems with  
52 anoxia, and the mechanism employed in these animals may also have medical application (Nilsson  
53 and Lutz, 2004).

54 Anoxia-tolerant turtles, such as the red-eared slider turtle (*Trachemys scripta*), defend ATP  
55 levels during anoxia through metabolic depression, which includes down-regulation of protein  
56 synthesis and a reduced cellular ion leakage that allows reduced ATP expenditure on ion pumping  
57 (Jackson, 2002; Milton and Prentice, 2007; Bickler and Buck, 2007; Stecyk et al., 2009). Also, red-  
58 eared slider turtles apparently go through cycles of anoxia and reoxygenation without the free  
59 radical damage seen during ischemia-reperfusion of tissues in mammals (Willmore and Storey,  
60 1997a). Thus, the turtles have evolved effective defense mechanisms that may involve reduced ROS  
61 production and/or efficient means of scavenging ROS (Milton and Prentice, 2007; Milton et al.,  
62 2007). While some hypoxia-tolerant species enhance antioxidant enzymes (e.g. superoxide  
63 dismutase, catalase) during oxygen lack, red-eared sliders actually show decreased activities of  
64 some antioxidant enzymes during anoxia, but the constitutive activities are high and may be  
65 sufficient to protect tissues from oxidation damage upon reoxygenation (Willmore and Storey,  
66 1997a; Hermes-Lima and Zenteno-Savin, 2002). Levels of the antioxidant glutathione are also high,  
67 but may decrease in some organs during anoxia (Willmore and Storey, 1997b). There are, however,  
68 alternative means to protect against ROS formation when anoxia is succeeded by reoxygenation.  
69 One such possibility is moderate elevation of nitric oxide and some of its metabolites that through

70 inhibition of complexes in the mitochondrial respiratory chain can limit ROS generation and tissue  
71 injury in mammalian ischemia/reperfusion models (Shiva et al., 2007a; Murillo et al., 2011;  
72 Chouchani et al., 2013). The involvement of NO and its metabolites in cytoprotection have not yet  
73 been explored in anoxia-tolerant turtles.

74 Nitric oxide (NO) is a ubiquitous signaling molecule that under aerobic conditions is produced  
75 from the reaction of L-arginine with O<sub>2</sub> catalyzed by nitric oxide synthases (NOS). NO typically  
76 exerts its physiological influences through nitrosylation of heme groups, forming iron-nitrosyl  
77 (FeNO) proteins, or via S-nitrosation of cysteines, forming S-nitroso (SNO) compounds (Denninger  
78 and Marletta, 1999; Foster et al., 2009; Hill et al., 2010). Other products derived from NO  
79 production include N-nitroso (NNO) compounds (formed in reactions with amines), nitrite (formed  
80 in reaction with O<sub>2</sub>) and nitrate (formed in reactions with oxygenated hemoglobin and myoglobin)  
81 (Umbrello et al., 2013). Recent research shows that endogenous nitrite represents a reservoir of NO  
82 activity that can be activated by a number of cellular proteins under O<sub>2</sub>-limiting conditions  
83 (Lundberg et al., 2008). Thus, nitrite can be reduced to NO by deoxygenated  
84 myoglobin/hemoglobin, xanthine oxidoreductase and other proteins, which supply an alternative  
85 pathway for NO formation, when NOS activity is compromised by oxygen shortage. Nitrate may  
86 similarly be recycled to NO, if it is first reduced to nitrite (Jansson et al., 2008; Lundberg et al.,  
87 2008). Furthermore, SNO compounds can donate NO activity by transnitrosation between low-  
88 molecular-weight SNOs and proteins or protein-protein transnitrosation (Nakamura and Lipton,  
89 2013). In this way many central NO metabolites contribute to the overall NO bioavailability, which  
90 could play an important role under hypoxic and anoxic conditions.

91 We recently showed that hypoxia-tolerant fish have profound capacity for defending intracellular  
92 NO metabolite levels during prolonged periods of hypoxia (Hansen and Jensen, 2010) and anoxia  
93 (Sandvik et al., 2012). Notably, in crucian carp, anoxia was associated with a dramatic increase of  
94 nitrite levels in heart tissue, which was paralleled by elevated concentrations of SNO and FeNO  
95 compounds, showing that nitrite was partially metabolized to NO (FeNO) and SNO (Sandvik et al.,  
96 2012). Given that experimental elevation of nitrite and NO alleviate injury to cardiac muscle during  
97 ischemia/reperfusion in mammals (Shiva et al., 2007; Hendgen-Cotta et al., 2008), it is likely that  
98 crucian carp up-regulates nitrite and NO levels to protect the heart from anoxia/reoxygenation  
99 damage (Sandvik et al., 2012). To ascertain whether this is a general and evolutionary conserved  
100 cytoprotective strategy amongst anoxia-tolerant vertebrates, it is imperative to study other archetype

101 anoxia-tolerant vertebrates, *viz.* freshwater turtles, some of which can survive anoxia for months at  
102 low temperature (Jackson, 2002).

103 There is only limited information on NO homeostasis in turtles. Circulating levels of NO  
104 metabolites are relatively high in *T. scripta* and increase during short-term anoxia and  
105 reoxygenation at room temperature (21 °C) (Jacobsen et al., 2012), but tissue NO levels, which are  
106 central in relation to cytoprotection, remain unknown. In the present study we focus on NO  
107 metabolites in a number of different tissues (heart, brain, liver, skeletal muscle and blood) during  
108 long-term anoxia at low temperature to simulate the ecological relevant situation of winter  
109 dormancy in ice-covered ponds (Jackson and Ultsch, 2010). We hypothesized that anoxic turtles  
110 would increase NO bioavailability in the tissues to cope with anoxia and subsequent reoxygenation.  
111 To gain detailed insight into the reoxygenation phase, we included both an acute (1 h) and longer-  
112 lasting (24 h) reoxygenation scheme. We also assessed glutathione in selected tissues and analyzed  
113 extracellular ionic composition to evaluate lactate load and acid-base-related consequences of  
114 anaerobiosis. Our results support a vivid participation of nitric oxide metabolites in the tolerance of  
115 red-eared sliders to anoxia and reoxygenation.

116

## 117 MATERIALS AND METHODS

118

### 119 *Experimental animals*

120 Red-eared sliders *Trachemys scripta* (Gray) with a body mass of  $395 \pm 14$  g (mean  $\pm$  s.e.m.,  $N = 25$ )  
121 were obtained from commercial suppliers and maintained in large aquaria (water temperature of 25  
122 °C) with free access to dry platforms under infrared lamps for behavioral thermoregulation. The  
123 turtles were fed fish and mussels, but food was withheld for two weeks before temperature was  
124 reduced.

125

### 126 *Thermal acclimation and exposure to anoxia and reoxygenation*

127 After two weeks of fasting, water temperature was lowered to 20 °C for one week, followed by a  
128 further reduction to 15 °C for an additional week. Then water temperature was reduced to 10 °C for  
129 two weeks, followed by three days at 5 °C. One group of normoxic turtles ( $N=7$ ) were then allowed  
130 continued access to air over the next 8 days, while 18 other turtles were subjected to anoxia for 9  
131 days by submergence in anoxic water bubbled continuously with nitrogen. The anoxic aquarium  
132 was covered with a plastic lid and contained a metal mesh below the water surface, so that the

133 turtles could not surface to breathe. The turtles were unrestrained and free to move within the  
134 aquarium. After 9 days, 6 of the anoxic turtles were sampled (anoxic group). Another 6 anoxic  
135 turtles were allowed to breathe air for 1 h (1 h reoxygenation), while the remaining 6 anoxic turtles  
136 were allowed to breathe air for 24 h (24 h reoxygenation).

137

### 138 *Anaesthesia and sampling of blood and organs*

139 The turtles were anaesthetized by an injection of 100 mg kg<sup>-1</sup> of the barbiturate Nembutal in the  
140 supravertebral venous sinus, which rendered the animals unresponsive within 5-15 min. The anoxic  
141 turtles had to be briefly removed from the water during the injection, but were immediately returned  
142 to the anoxic water while the anesthesia took effect. When the turtles lost all responses to pinching  
143 of the legs as well as the corneal reflex, they were placed in a supine position on ice and a 6 × 4 cm  
144 portion of the plastron was quickly excised using a bone saw, so 2-3 ml blood could be sampled  
145 from the left aortic arch or by cardiac puncture into heparinized syringes. The blood was processed  
146 immediately, while samples of ventricle, pectoral muscle, liver and brain were excised.

147 Blood was transferred to a pre-weighed tube, and subsamples were taken for measurements of  
148 plasma lactate and plasma glutathione (cf. below). The remaining blood was centrifuged (2 min at  
149 16,000 g and 5°C), and the plasma was transferred to a new tube and frozen in liquid nitrogen. The  
150 tube containing the red blood cells (RBCs) was weighed (to determine RBC mass) and then frozen  
151 in liquid nitrogen. Each dissected organ/tissue was instantly washed in cold phosphate-buffered  
152 saline [50 mmol l<sup>-1</sup> phosphate buffer pH 7.8; 85 mmol l<sup>-1</sup> NaCl; 2.4 mmol l<sup>-1</sup> KCl; 10 mmol l<sup>-1</sup> N-  
153 ethylmaleimide (NEM); 0.1 mmol l<sup>-1</sup> diethylethylaminepentaacetic acid (DTPA)], and then dried on a  
154 paper towel, weighed and frozen in liquid N<sub>2</sub>. The entire sampling procedure lasted less than 10  
155 min. Procedures were performed in accordance with the laws of animal care and experimentation in  
156 Denmark.

157

### 158 *Measurements*

159 For measurements of NO metabolites, the samples of ventricle, pectoral muscle, liver and brain  
160 tissues were thawed in four times their mass of a 50 mmol l<sup>-1</sup> phosphate buffer (pH 7.3), containing  
161 10 mmol l<sup>-1</sup> NEM and 0.1 mmol l<sup>-1</sup> DTPA (Sigma-Aldrich, Steinheim, Germany) to stabilize S-  
162 nitrosothiols (Yang et al., 2003). The samples were homogenized and centrifuged (6 min, 16000 g,  
163 2°C), after which the supernatants were frozen in liquid nitrogen and stored at -80 °C until  
164 measured. The RBCs samples were thawed by adding nine times their mass of a nitrite/SNO

165 preservation solution, consisting of 5 mmol l<sup>-1</sup> K<sub>3</sub>[Fe(CN)<sub>6</sub>], 10 mmol l<sup>-1</sup> NEM, 0,1 mmol l<sup>-1</sup> DTPA  
166 and 1% NP-40 (Yang et al., 2003; Hansen and Jensen, 2010). The hemolysate was vortexed and  
167 centrifuged, and supernatants were immediately measured.

168 NO metabolites were assessed by reductive chemiluminescence, using a Sievers (Boulder, CO,  
169 USA) Nitric Oxide Analyzer (model 280i) and previously described procedures to distinguish  
170 between [nitrate], [nitrite], [SNO] and [FeNO + NNO] (Yang et al., 2003; Hansen and Jensen,  
171 2010). Glutathione was measured in plasma, heart and liver, using a colorimetric detection kit  
172 according to the manufactures instructions (Arbor Assays, catalog number K006-H1). Protein was  
173 ascertained in heart homogenates by a NanoDrop 1000 spectrophotometer (Thermo Scientific,  
174 Wilmington, DE, USA). Plasma lactate was assessed by the lactate dehydrogenase method after  
175 deproteinization of plasma with 0.6 M perchloric acid. Plasma chloride was measured by  
176 coulometric titration (Sherwood Scientific Chloride Analyzer 926S), and plasma sodium,  
177 potassium, calcium and magnesium were determined by atomic absorption spectroscopy (Perkin  
178 Elmer AAnalyst 100).

179

### 180 *Statistics*

181 All results are presented as means + s.e.m. Statistical differences between exposure groups were  
182 evaluated by one-way ANOVA followed by the Tukey post hoc means comparison test (Origin 8.5,  
183 OriginLab Corporation, Northampton, MA, USA). Differences between means were considered  
184 significant at P < 0.05.

185

## 186 **RESULTS**

187 Plasma nitrite was 0.55 μM in normoxic control animals and did not change significantly with  
188 anoxia or reoxygenation (Fig. 1A). Plasma [SNO] similarly did not vary significantly between  
189 groups (Fig. 1B), whereas plasma [FeNO + NNO] was significantly elevated after 9 days of anoxia  
190 in order to recover partially during 24 h of reoxygenation (Fig. 1C). Plasma nitrate was relatively  
191 high in normoxic control animals (~400 μM) and did not differ significantly among experimental  
192 groups (Fig. 1D).

193 In contrast to the modest changes in the plasma, there were large significant increases in [nitrite],  
194 [SNO] and [FeNO + NNO] inside the RBCs after 9 days of anoxia (Fig. 2A,B,C). The intracellular  
195 NO metabolites increased to values considerably above values both in normoxic controls (Fig. 2)  
196 and in the extracellular compartment (Fig. 1). Reoxygenation reversed the changes and induced

197 significant decreases in erythrocyte nitrite, SNO and FeNO+NNO, but values did not quite reach  
198 basal levels by 24 h reoxygenation (Fig 2). Nitrate tended to increase with anoxia ( $P = 0.085$ ) and  
199 then decreased with reoxygenation (Fig. 2D).

200 In the heart ventricle, nitrite showed a significant five-fold increase from  $0.54 \mu\text{M}$  in normoxic  
201 controls to  $2.83 \mu\text{M}$  after 9 days of anoxia, which was succeeded by a gradual and partial recovery  
202 towards control values during 24 h of reoxygenation (Fig. 3A). Ventricle [SNO] also showed a  
203 large increase with anoxia, followed by a decline in values during reoxygenation. This decrease in  
204 [SNO] was significant already by 1 h of reoxygenation (Fig. 3B). Heart [FeNO + NNO] similarly  
205 rose during anoxia and decreased during reoxygenation (Fig. 3C), whereas nitrate did not change  
206 significantly (Fig. 3D). Heart protein was constant around  $50 \text{ mg g}^{-1}$  wetweight in all exposure  
207 groups. As a consequence, heart NO metabolites normalized to protein showed the same patterns of  
208 changes as for the absolute concentrations presented in Figure 3 (not illustrated), revealing that the  
209 concentrations were not significantly influenced by water shifts between extracellular and  
210 intracellular compartments.

211 Brain nitrite and nitrate remained relative constant with treatment (Fig. 4A,C), while the  
212 concentration of nitros(yl)ated species (SNO+FeNO+NNO) in the brain increased significantly with  
213 anoxia and reoxygenation (Fig. 4B).

214 Liver nitrite was kept relatively constant at  $0.8\text{-}1 \mu\text{M}$  in normoxic, anoxic and reoxygenated  
215 turtles (Fig. 5A). At the same time there were major increases in liver [SNO] (Fig. 5B) and  
216 [FeNO+NNO] (Fig. 5C) during anoxia that reversed towards control values during subsequent  
217 reoxygenation. Liver nitrate increased with anoxia and decreased with reoxygenation (Fig. 5D).

218 Anoxia triggered a significant elevation of the nitrite concentration in pectoral muscle with  
219 subsequent partial recovery during reoxygenation (Fig. 6A). Concomitantly there were major  
220 anoxia-induced increases in muscle [SNO] and [FeNO + NNO] (Fig. 6B,C). The muscle [SNO]  
221 recovered towards control values already by 1 h of reoxygenation (Fig.6B), while the decrease in  
222 [FeNO + NNO] during reoxygenation was slower (Fig. 6C). Muscle nitrate was not affected by  
223 treatment (Fig. 6D).

224 Plasma glutathione levels were in the low micromolar range in normoxic turtles and increased  
225 significantly with anoxia in order to recover with reoxygenation (Fig. 7A). Total glutathione was  
226 around  $1 \text{ mM}$  in the heart and some  $2\text{-}3 \text{ mM}$  in the liver (Fig. 7B,C) and did not change  
227 significantly with anoxia or reoxygenation.



228 Plasma lactate showed a pronounced significant increase from 1 mM to 51 mM during 9 days of  
229 anoxia, followed by a gradual and significant recovery to 34.4 mM by 24 h reoxygenation (Fig.  
230 8A). Lactate values were, however, considerably above controls at 24 h of recovery. Plasma  
231 chloride decreased significantly by some 10 mM during anoxia (Fig. 8A). Among cations,  
232 significant increases were observed in plasma  $K^+$  (from 3.1 to 5.7 mM),  $Ca^{2+}$  (from 2.2 to 7.7 mM)  
233 and  $Mg^{2+}$  (from 1.6 to 3.1 mM) during anoxia followed by incomplete recovery during  
234 reoxygenation (Fig. 8B). Plasma  $Na^+$  showed a trend for an increase, but changes in  $Na^+$  were not  
235 significant. Anoxia caused increases in the sum of measured anions (Fig. 8A) and the sum of  
236 measured cations (Fig. 8B), suggesting an increase in total osmolality. It was also evident that the  
237 sum of strong anions ( $Cl^-$  and lactate) increased more than the sum of strong cations ( $Na^+$ ,  $K^+$ ,  $Ca^{2+}$   
238 and  $Mg^{2+}$ ) during anoxia (Fig. 8A,B). The strong ion difference (SID), which is a major  
239 independent variable in acid-base status (Stewart, 1983), was accordingly calculated as:

240

$$241 \text{SID} = ([Na^+] + [K^+] + 2[Ca^{2+}] + 2[Mg^{2+}]) - ([Cl^-] + [lactate])$$

242

243 Anoxia induced a significant decrease in SID with subsequent recovery during reoxygenation (Fig  
244 8C).

245

## 246 DISCUSSION

247

248 The present study documents profound and dynamic changes in tissue NO metabolites that seems to  
249 be part of the adaptation strategy to anoxia and reoxygenation in the freshwater turtle *T. scripta*.  
250 Nitrite was either increased or kept constant in anoxic tissues. In all the tissues, nitrite was used to  
251 produce NO, as evidenced by a general increase in iron-nitrosylated (FeNO) compounds. At the  
252 same time there was a universal elevation of cellular S-nitroso (SNO) compounds. This overall  
253 increase in NO bioavailability may protect the cells from destructive  $Ca^{2+}$  influx during anoxia and  
254 limit ROS formation and ROS-induced damage during reoxygenation, as discussed below.

255

### 256 *Tissue NO metabolites in anoxia and reoxygenation*

257 Nitrite was increased considerably above control levels in the anoxic turtle heart, and this was  
258 associated with major increases in [SNO] and [FeNO + NNO] (Fig. 3). Similar changes were  
259 recently reported in the hearts of anoxia-exposed crucian carp (Sandvik et al., 2012). Thus, it

260 appears that an increase in NO bioavailability inside the heart constitutes a general mechanism for  
261 cardioprotection in anoxia-tolerant vertebrates. Many studies with mammalian models have shown  
262 that moderate elevations of nitrite reduce cell death and infarct size following myocardial ischemia  
263 and reperfusion (Webb et al., 2004; Duranski et al., 2005; Shiva et al., 2007a; Hendgen-Cotta et al.,  
264 2008). Such cytoprotection from elevated nitrite could be essential to preserve cardiac function in  
265 turtle and crucian carp during and after anoxia. Notably, in contrast to the experimental addition of  
266 nitrite that is required for cytoprotection in mammals, the freshwater turtle and crucian carp possess  
267 innate physiological mechanisms that elevate cardiac nitrite in anoxia. In the anoxic heart, nitrite is  
268 reduced to NO mainly by deoxygenated myoglobin, and much of the nitrite/NO-dependent  
269 cytoprotection is targeted at the mitochondria, involving Fe-nitrosylation of complex IV and S-  
270 nitrosation of complex I of the respiratory chain (Hendgen-Cotta et al., 2008; Murillo et al., 2011).  
271 Inhibition of complex I by S-nitrosation seems to play a central role by limiting mitochondrial ROS  
272 generation and ROS-induced damage upon reoxygenation (Shiva et al., 2007a; Murillo et al., 2011).  
273 The key mechanism seems to be S-nitrosation of a conserved cysteine on the ND3 subunit of  
274 complex I, which slows the reactivation of mitochondria during early reoxygenation, thereby  
275 decreasing ROS production and oxidative damage (Chouchani et al., 2013). However, a number of  
276 other proteins may also be S-nitrosated and contribute to cardioprotection (Sun et al., 2007; Lima et  
277 al., 2009; Murphy et al., 2012). For instance, problems with cytosolic  $Ca^{2+}$  overload during anoxia  
278 and early reoxygenation may be alleviated by S-nitrosylation of the L-type  $Ca^{2+}$  channel (which  
279 inhibits its activity and reduces cellular  $Ca^{2+}$  influx) and by S-nitrosylation of the  $Ca^{2+}$  ATPase  
280 SERCA2a (which increases  $Ca^{2+}$  uptake into the sarcoplasmic reticulum) (Sun et al., 2007; Sun and  
281 Murphy, 2010). Furthermore, S-nitrosation of protein thiols provide general protection against  
282 ROS-induced irreversible oxidation of thiols, limiting the need for degradation and re-synthesis of  
283 damaged proteins after an anoxia/reoxygenation event (Sun and Murphy, 2010; Kohr et al., 2011).

284 The rise in cardiac SNO in anoxic turtles was succeeded by a decrease at 1 h of reoxygenation  
285 (Fig 3B), which supports a dynamic role of S-nitrosation and documents that the process is  
286 reversible, as required for an appropriate cardioprotective signal. Thus, while S-nitrosation of  
287 complex I would be beneficial by limiting ROS formation during early reoxygenation (Shiva et al.,  
288 2007a; Chouchani et al., 2013), the inhibition of complex I should gradually be reversed to allow  
289 oxidative phosphorylation to resume. The kinetics of these changes may be relatively slow in the  
290 turtles due to the low temperature and anoxia-induced hypometabolism.

291 In the brain (Fig. 4) and the liver (Fig. 5), nitrite stayed constant with anoxia, whereas  
292 nitros(yl)ated species increased, enlarging the overall pool of NO metabolites. This resembles the  
293 situation in anoxic crucian carp (Sandvik et al., 2012). Thus, while there are organ-specific  
294 differences in individual NO metabolite changes, these are rather similar in the two anoxia-tolerant  
295 species. Conceivably, nitrite-linked NO and SNO formation provide cytoprotection in liver and  
296 brain – like in the heart – as supported by mammalian ischemia/reperfusion experiments addressing  
297 these organs (Duranski et al., 2005; Jung et al., 2006; Shiva et al., 2007a; Dezfulian et al., 2012).  
298 Turtle neurons have reduced membrane ion permeability (“channel arrest”) in anoxia, which  
299 decreases the requirements for active ion pumping and thereby ATP expenditure (Nilsson and Lutz,  
300 2004). An important target is the *N*-methyl-D-aspartate (NMDA) receptor, because down-regulation  
301 of this cation channel in anoxic turtles is central for avoiding the massive  $\text{Ca}^{2+}$  influx that triggers  
302 neuronal death in anoxic mammalian brains (Buck and Bickler, 1998; Bickler and Buck, 2007).  
303 Interestingly, the NMDA receptor is preferentially inhibited by NO via *S*-nitrosation under low-  
304 oxygen conditions (Takahashi et al., 2007), suggesting that *S*-nitrosylation via nitrite or nitrite-  
305 derived NO could contribute to NMDR receptor down-regulation in the anoxic turtle brain.

306 Anoxia caused significant elevations of nitrite, SNO and FeNO in the pectoral muscle of the  
307 turtles (Fig. 6). This response differs from the decrease in nitrite and marginal change of SNO and  
308 FeNO in white skeletal muscle of hypoxic goldfish (Hansen and Jensen, 2010) or anoxic crucian  
309 carp (Sandvik et al., 2012). The pectoral muscle in turtles contains both white and red fibers, and it  
310 therefore seems that a higher muscle myoglobin and mitochondria content due to presence of red  
311 fibers is associated with higher nitrite levels, higher SNO levels and higher NO formation from  
312 nitrite (FeNO) during anoxia. Deoxygenated myoglobin effectively reduces nitrite to NO (Shiva et  
313 al., 2007b; Helbo et al., 2013), but myoglobin may also be important in elevating muscle nitrite  
314 levels. We suggest that the negatively charged nitrite ion binds to positive charges on myoglobin,  
315 and that this binding increases during anoxia, because the net positive charge on myoglobin  
316 progressively increases due to its buffering of  $\text{H}^+$  from the anoxia-induced acidosis. Such binding of  
317 nitrite to cellular proteins would elevate total cellular nitrite while keeping the free cytosolic nitrite  
318 concentration low to promote influx of nitrite from the extracellular compartment (Hansen and  
319 Jensen, 2010). Binding of nitrite to myoglobin may also underlie the rise in cardiac nitrite during  
320 anoxia (Fig. 3A), while the rise in RBC nitrite (Fig. 2A) can be explained by similar nitrite binding  
321 to deoxygenated hemoglobin.

322 The rise in RBC nitrite in anoxic turtles was much higher than observed in anoxic crucian carp  
323 (Sandvik et al., 2012). This may be a consequence of the very large anaerobic lactic acid production  
324 in turtles, which titrates the hemoglobin towards possession of more positive charges (potentially  
325 binding nitrite), whereas crucian carp convert lactate to ethanol, rendering their anaerobic  
326 metabolism acid-base neutral (Nilsson and Lutz, 2004; Bickler and Buck, 2007). Erythrocyte [SNO]  
327 and [FeNO + NNO] also increased considerably in anoxic turtles (Fig. 2), reflecting a high RBC  
328 thiol content and a relatively high nitrite-reductase capability of the deoxygenated Hb (Jacobsen et  
329 al., 2012). Apart from being cytoprotective, the extraordinary large increases in RBC nitrite and  
330 SNO may play a role in hemostasis. Blood circulation is extremely slow in anoxic turtles at low  
331 temperature (heart rate  $< 0.5 \text{ min}^{-1}$ ), which introduces the risk of blood clotting due to stagnant  
332 blood (Jackson, 2002). Endothelial NO inhibits platelet activation and aggregation in mammals (Wu  
333 and Thiagarajan, 1996). Assuming a similar inhibition in turtle thrombocytes, the high RBC levels  
334 of nitrite and SNO could deliver NO bioavailability to inhibit thrombosis formation in anoxia. This  
335 entails RBC escape of NO produced by deoxyHb-mediated nitrite reduction and/or transnitrosation  
336 processes across the membrane (Pawloski et al., 2001; Cosby et al., 2003; Jensen 2009b). Platelet  
337 inhibition by nitrite-derived NO from deoxygenated erythrocytes was recently documented in  
338 human RBCs (Srihirun et al., 2012).

339

340 *Where does tissue nitrite originate from?*

341 It is intriguing that the steady state concentration of nitrite in tissues either increased (heart, pectoral  
342 muscle, RBCs) or remained constant (brain, liver) during anoxia, where nitrite formation from  
343 autoxidation of NOS-derived NO is halted due to complete  $\text{O}_2$  lack, and where nitrite is continually  
344 used to produce NO (as shown by elevated FeNO) and SNO. A similar situation was observed in  
345 anoxic crucian carp (Sandvik et al., 2012) and hypoxic goldfish (Hansen and Jensen, 2010). In both  
346 of these fish species plasma nitrite declined during hypoxia/anoxia, suggesting that nitrite was  
347 transferred from extracellular to intracellular compartments (Hansen and Jensen, 2010; Sandvik et  
348 al., 2012). In the anoxic turtle, plasma nitrite tended to increase (Fig. 1A). One possible explanation  
349 that is compatible with these findings is that nitrite originates from an internal or external reservoir  
350 and is carried in the blood to be taken up into the tissues. This would increase or decrease steady  
351 state plasma nitrite, depending on uptake/release rates from the reservoir and tissue nitrite  
352 consumption rates. In the case of fish, the reservoir could be ambient nitrite that is taken up across  
353 the gills (Jensen, 2009a; Sandvik et al., 2012). Ambient nitrite could also play a role in the turtle, if

354 it swallows water and take up nitrite across the intestine. Additionally, we hypothesize that the shell  
355 contains reservoirs of nitrite and nitrate salts that are released to the blood upon acidification during  
356 anoxia, much in line with the release of calcium and magnesium carbonates used in buffering (cf.  
357 below). We are currently investigating these possibilities.

358 It is furthermore plausible that tissue nitrite could be supplemented through reduction of nitrate  
359 to nitrite (Lundberg et al., 2008). While the tissue nitrate measurements did not support this idea by  
360 showing a decrease in  $[\text{NO}_3^-]$  during anoxia, it should be remembered that maintenance or increase  
361 in tissue nitrite would require an only low micromolar change in nitrate, which is difficult to detect  
362 on the very high background concentration of nitrate in the turtles. Furthermore, tissue nitrate could  
363 be upheld through supply from reservoirs, as suggested for nitrite, compounding interpretations  
364 from concentration measurements. Nitrate reduction to nitrite therefore remains an option for  
365 further investigation.

366

#### 367 *Glutathione and protein thiols*

368 Glutathione is an important cellular redox buffer and antioxidant, and high levels would provide  
369 protection against oxidative stress when anoxic tissues are reoxygenated (Deneke, 2000). Tissue  
370 levels of total glutathione in *T. scripta* are relatively high in comparison with other ectotherms but  
371 was reported to decrease in some organs (including liver and heart) during 20 h anoxia at 5 °C  
372 (Willmore and Storey, 1997b). Our glutathione concentrations in liver and heart compares with the  
373 previous reported values, but a decrease in values was not observed following the longer (9 days)  
374 anoxia exposure here used (Fig. 7). While tissue glutathione concentrations are in the low  
375 millimolar range, plasma values are only in the micromolar range (Fig. 7). A significant increase in  
376 plasma glutathione was observed during anoxia (Fig. 7A), which can be ascribed to export from  
377 cells, possibly liver cells (Deneke, 2000).

378 The main antioxidant capacity of the blood resides inside the RBCs. *T. scripta* was suggested to  
379 contain Hb with a high pool of reactive thiols with antioxidant capacity (Reischl et al., 2007), and  
380 we recently measured a total erythrocyte thiol concentration of 24 mM in *T. scripta* (Jacobsen et  
381 al., 2012), which is much higher than in most vertebrates but similar to another freshwater turtle  
382 *Phrynops hilarii* (Reischl, 1986). Given that erythrocyte glutathione is ~2 mM (Reischl, 1986), it  
383 would seem that turtle Hb contains many thiols that might partake in quenching ROS produced  
384 inside the mitochondria-containing erythrocytes when they re-oxygenate. Protein surface thiols may

385 actually generally dominate over glutathione in the protection against oxidative damage in tissue  
386 cells (Hansen et al., 2009; Requejo et al., 2010).

387

#### 388 *Electrolyte status*

389 Anaerobiosis increased plasma lactate to 51 mM during 9 days of anoxia at 5°C (Fig. 8A), which  
390 matches extrapolation of time-dependent lactate changes during 7 days of anoxia in *T. scripta*  
391 (Warren and Jackson, 2007). The increases in  $\text{Ca}^{2+}$  and  $\text{Mg}^{2+}$  during anoxia (Fig. 8) are also of the  
392 expected magnitude, and results from the release of  $\text{Ca}^{2+}$  and  $\text{Mg}^{2+}$  carbonates from shell and  
393 skeleton to buffer the anaerobically-produced lactic acid (Jackson, 2002; Warren and Jackson,  
394 2007). The combined changes in strong anions ( $\text{Cl}^-$  and lactate) and strong cations ( $\text{Na}^+$ ,  $\text{K}^+$ ,  $\text{Ca}^{2+}$   
395 and  $\text{Mg}^{2+}$ ) resulted in a significant decrease in SID (Fig. 8C), effecting metabolic acidosis with  
396 associated decreases in plasma bicarbonate and the negative charge carried by plasma proteins and  
397 inorganic phosphate (Stewart, 1983; Fencl and Leith, 1993). While the total extracellular electrolyte  
398 concentration and osmolality increases during anoxia, the fractional water content in tissues  
399 (cardiac muscle, skeletal muscle and liver) remain stable due to effective cell volume regulation  
400 (Jackson and Heisler, 1983). This implies that the measured concentrations of NO metabolites were  
401 not influenced by water shifts between intracellular and extracellular compartments, as also  
402 supported by constancy in heart protein concentration during exposures (cf. results).

403

#### 404 *Concluding remarks*

405 The findings that anoxia increases nitrite, SNO and FeNO concentrations in multiple tissues of both  
406 crucian carp (Sandvik et al., 2012) and red-eared sliders (present study) – two archetypical anoxia-  
407 tolerant vertebrates – suggest that this is a general and evolutionary old mechanism involved in  
408 surviving anoxia and protecting tissues against injury during anoxia and subsequent reoxygenation.  
409 The elevation of nitrite to produce NO and S-nitrosate critical proteins may be particularly  
410 important in limiting ROS formation during reoxygenation and thus be central to the anti-oxidant  
411 strategy that prevents injury during anoxia and reoxygenation in anoxia-tolerant vertebrates. The  
412 increase in NO bioavailability during anoxia, where ordinary NOS activity is halted, calls for future  
413 studies on the roles of internal and/or external nitrite reservoirs and cellular nitrate reduction to  
414 nitrite.

415

#### 416 **Acknowledgements**

417 We thank Heidi M. Jensen and Rasmus Buchanan for help with turtle exposures, Angela Fago and  
418 Anny Bang for help during sampling, and Inge Sejling for help with cation measurements.

419

#### 420 **Funding**

421 The work was supported by the Danish Natural Science Research Council.

422

#### 423 **Author contributions**

424 F.B.J., M.N.H. and T.W. conceived and designed the experiments; F.B.J., M.N.H., G.M. and T.W.  
425 performed the experiments; F.B.J. and M.N.H. analyzed the data; F.B.J. wrote the paper; M.N.H.,  
426 G.M. and T.W. edited the manuscript.

427

#### 428 **REFERENCES**

- 429 **Bickler, P. E. and Buck, L. T.** (2007). Hypoxia tolerance in reptiles, amphibians and fishes: Life  
430 with variable oxygen availability. *Annu. Rev. Physiol.* **69**, 145-170.
- 431 **Buck, L. T. and Bickler, P. E.** (1998). Adenosine and anoxia reduce *N*-methyl-D-aspartate receptor  
432 open probability in turtle cerebrocortex. *J. Exp. Biol.* **201**, 289-297.
- 433 **Cosby, K., Partovi, K. S., Crawford, J. H., Patel, R. P., Reiter, C. D., Martyr, S., Yang, B. K.,**  
434 **Waclawiw, M. A., Zalos, G., Xu, X. et al.** (2003). Nitrite reduction to nitric oxide by  
435 deoxyhemoglobin vasodilates the human circulation. *Nat. Med.* **9**, 1498-1505.
- 436 **Chouchani, E. T., Methner, C., Nadtochiy, S. M., Logan, A., Pell, V. R., Ding, S., James, A.**  
437 **M., Cochemé, H. M., Reinhold, J., Lilley, K. S. et al.** (2013). Cardioprotection by S-nitrosation  
438 of a cysteine switch in mitochondrial complex I. *Nat. Med.* **19**, 753-759.
- 439 **Deneke, S. M.** (2000) Thiol-based antioxidants. *Curr. Top. Cell. Regul.* **36**, 151-180.
- 440 **Denninger, J. W. and Marletta, M. A.** (1999). Guanylate cyclase and the NO/cGMP signaling  
441 pathway. *Biochim. Biophys. Acta.* **1411**, 334-350.
- 442 **Dezfulian, C., Alekseyenko, A., Dave, K. R., Raval, A. P., Do, R., Kim, F. and Perez-Pinzon,**  
443 **M. A.** (2012). Nitrite therapy is neuroprotective and safe in cardiac arrest survivors. *Nitric Oxide*  
444 **26**, 241-250.
- 445 **Duranski, M. R., Greer, J. J. M., Dejam, A., Jaganmohan, S., Hogg, N., Langston, W., Patel,**  
446 **R. P., Yet, S. F., Wang, X. D., Kevil, C. G. et al.** (2005). Cytoprotective effects of nitrite during  
447 in vivo ischemia-reperfusion of the heart and liver. *J. Clin. Invest.* **115**, 1232-1240.

- 448 **Fencl, V. and Leith, D. E.** (1993). Stewart's quantitative acid-base chemistry: applications in  
449 biology and medicine. *Respir. Physiol.* **91**, 1-16.
- 450 **Foster, M. W., Hess, D. T. and Stamler, J. S.** (2009). Protein S-nitrosylation in health and disease:  
451 a current perspective. *Trends Mol. Med.* **15**, 391-404.
- 452 **Hansen, M. N. and Jensen, F. B.** (2010). Nitric oxide metabolites in goldfish under normoxic and  
453 hypoxic conditions. *J. Exp. Biol.* **213**, 3593-3602.
- 454 **Hansen, R. E., Roth, D. and Winther, J. R.** (2009). Quantifying the global cellular thiol-disulfide  
455 status. *Proc. Natl. Acad. Sci. USA* **106**, 422-427.
- 456 **Helbo, S., Weber, R. E. and Fago, A.** (2013). Expression patterns and adaptive functional  
457 diversity of vertebrate myoglobins. *Biochim. Biophys. Acta* **1834**, 1832-1839.
- 458 **Hendgen-Cotta, U. B., Merx, M. W., Shiva, S., Schmitz, J., Becher, S., Klare, J. P., Steinhoff,  
459 H. J., Goedecke, A., Schrader, J., Gladwin, M. T. et al.** (2008). Nitrite reductase activity of  
460 myoglobin regulates respiration and cellular viability in myocardial ischemia-reperfusion injury.  
461 *Proc. Natl. Acad. Sci. USA* **105**, 10256-10261.
- 462 **Hermes-Lima, M. and Zenteno-Savin, T.** (2002). Animal response to drastic changes in oxygen  
463 availability and physiological oxidative stress. *Comp. Biochem. Physiol. C* **133**, 537-556.
- 464 **Hill, B. G., Dranka, B. P., Bailey, S. M., Lancaster, J. R. and Darley-USmar, V. M.** (2010).  
465 What part of NO don't you understand? Some answers to the cardinal questions in nitric oxide  
466 biology. *J. Biol. Chem.* **285**, 19699-19704.
- 467 **Jackson, D. C.** (2002). Hibernating without oxygen: physiological adaptations of the painted turtle.  
468 *J. Physiol.* **543**, 731-737.
- 469 **Jackson, D. C. and Heisler, N.** (1983). Intracellular and extracellular acid-base and electrolyte  
470 status of submerged anoxic turtles at 3 °C. *Respir. Physiol.* **53**, 187-201.
- 471 **Jackson, D. C. and Ultsch, G. R.** (2010). Physiology of hibernation under the ice by turtles and  
472 frogs. *J. Exp. Zool.* **313A**, 311-327.
- 473 **Jacobsen, S. B., Hansen, M. N., Jensen, F. B., Skovgaard, N., Wang, T. and Fago, A.** (2012).  
474 Circulating nitric oxide metabolites and cardiovascular changes in the turtle *Trachemys scripta*  
475 during normoxia, anoxia and reoxygenation. *J. Exp. Biol.* **215**, 2560-2566.
- 476 **Jansson, E. A., Huang, L., Malkey, R., Govoni, M., Nihlén, C., Olsson, A., Stensdotter, M.,  
477 Petersson, J., Holm, L., Weitzberg, E. et al.** (2008). A mammalian functional nitrate reductase  
478 that regulates nitrite and nitric oxide homeostasis. *Nat. Chem. Biol.* **4**, 411-417.



- 479 **Jensen, F. B.** (2009a). The role of nitrite in nitric oxide homeostasis: A comparative perspective.  
480 *Biochim. Biophys. Acta* **1787**, 841-848.
- 481 **Jensen, F. B.** (2009b). The dual roles of red blood cells in tissue oxygen delivery: oxygen carriers  
482 and regulators of local blood flow. *J. Exp. Biol.* **212**, 3387-3393.
- 483 **Jung, K. H., Chu, K., Ko, S. Y., Lee, S. T., Sinn, D. I., Park, D. K., Kim, J. M., Song, E. C.,**  
484 **Kim, M. and Roh, J. K.** (2006). Early intravenous infusion of sodium nitrite protects brain  
485 against in vivo ischemia-reperfusion injury. *Stroke* **37**, 2744-2750.
- 486 **Kohr, M. J., Sun, J., Aponte, A., Wang, G., Gucek, M., Murphy, E. and Steenbergen, C.**  
487 (2011). Simultaneous measurement of protein oxidation and S-nitrosylation during  
488 preconditioning and ischemia/reperfusion injury with resin-assisted capture. *Circ. Res.* **108**, 418-  
489 426.
- 490 **Lefer, D. J. and Granger, N.** (2000). Oxidative stress and cardiac disease. *Am. J. Med.* **109**, 315-  
491 323.
- 492 **Lima, B., Lam, G. K. W., Xie, L., Diesen, D. L., Villamizar, N., Nienaber, J., Messina, E.,**  
493 **Bowles, D., Kontos, C. D., Hare, J. M. et al.** (2009). Endogenous S-nitrosothiols protect  
494 against myocardial injury. *Proc. Natl. Acad. Sci. USA* **106**, 6297-6302.
- 495 **Lundberg, J. O., Weitzberg, E. and Gladwin, M. T.** (2008). The nitrate-nitrite-nitric oxide  
496 pathway in physiology and therapeutics. *Nat. Rev. Drug Dis.* **7**, 156-167.
- 497 **Lutz, P. L.** (1992). Mechanisms for anoxic survival in the vertebrate brain. *Annu. Rev. Physiol.* **54**,  
498 601-618.
- 499 **Milton, S. L. and Prentice, H. M.** (2007). Beyond anoxia: The physiology of metabolic  
500 downregulation and recovery in the anoxia-tolerant turtle. *Comp. Biochem. Physiol. A* **147**, 277-  
501 290.
- 502 **Milton, S. L., Nayak, G., Kesaraju, S., Kara, L. and Prentice, H. M.** (2007). Suppression of  
503 reactive oxygen species production enhances neuronal survival *in vitro* and *in vivo* in the anoxia-  
504 tolerant turtle *Trachemys scripta*. *J. Neurochem.* **101**, 993-1001.
- 505 **Murillo, D., Kamga, C., Mo, L. and Shiva, S.** (2011). Nitrite as a mediator of ischemic  
506 preconditioning and cytoprotection. *Nitric Oxide* **25**, 70-80.
- 507 **Murphy, E., Kohr, M., Sun, J., Nguyen, T. and Steenbergen, C.** (2012). S-nitrosylation: A  
508 radical way to protect the heart. *J. Molec. Cell. Cardiol.* **52**, 568-577.
- 509 **Nakamura, T. and Lipton, S. A.** (2013). Emerging role of protein-protein transnitrosylation in cell  
510 signaling pathways. *Antioxid. Redox Signal.* **18**, 239-249.

- 511 **Nilsson, G. E. and Lutz, P. L.** (2004). Anoxia tolerant brains. *J. Cereb. Blood Flow Metab.* **24**,  
512 475-486.
- 513 **Pawloski, J. R., Hess, D. T. and Stamler, J. S.** (2001). Export by red blood cells of nitric oxide  
514 bioactivity. *Nature* **409**, 622-626.
- 515 **Reischl, E.** (1986). High sulfhydryl content in turtle erythrocytes: is there a relation with resistance  
516 to hypoxia? *Comp. Biochem. Physiol.* **85B**, 723-726.
- 517 **Reischl, E., Dafre, A. L., Franco, J. L. and Filho, D. W.** (2007). Distribution, adaptation and  
518 physiological meaning of thiols from vertebrate hemoglobins. *Comp. Biochem. Physiol. C* **146**,  
519 22-53.
- 520 **Requejo, R., Hurd, T. R., Costa, N. J. and Murphy, M. P.** (2010). Cysteine residues exposed on  
521 protein surfaces are the dominant intramitochondrial thiol and may protect against oxidative  
522 damage. *FEBS J.* **277**, 1465-1480.
- 523 **Sandvik, G. K., Nilsson, G. E. and Jensen, F. B.** (2012). Dramatic increase of nitrite levels in  
524 hearts of anoxia-exposed crucian carp supporting a role in cardioprotection. *Am. J. Physiol.*  
525 *Regul. Integr. Comp. Physiol.* **302**, R468-R477.
- 526 **Shiva, S., Sack, M. N., Greer, J. J., Duranski, M., Ringwood, L. A., Burwell, L., Wang, X.,**  
527 **MacArthur, P. H., Shoja, A., Raghavachari, N. et al.** (2007a). Nitrite augments tolerance to  
528 ischemia/reperfusion injury via the modulation of mitochondrial electron transfer. *J. Exp. Med.*  
529 **204**, 2089-2102.
- 530 **Shiva, S., Huang, Z., Grubina, R., Sun, J., Ringwood, L. A., MacArthur, P. H., Xu, X.,**  
531 **Murphy, E., Darley-USmar, V. M. and Gladwin, M. T.** (2007b). Deoxymyoglobin is a nitrite  
532 reductase that generates nitric oxide and regulates mitochondrial respiration. *Circ. Res.* **100**, 654-  
533 661.
- 534 **Srihirun, S., Sriwantana, T., Unchern, S., Kittikool, D., Nulsri, E., Pattanapanyasat, K.,**  
535 **Fucharoen, S., Pikhova, B., Schechter, A. N. and Sibmooh, N.** (2012). Platelet inhibition by  
536 nitrite is dependent on erythrocytes and deoxygenation. *PLoS One* **7**: e30380
- 537 **Stecyk, J. A. W., Bock, C., Overgaard, J., Wang, T., Farrell, A. P. and Pörtner, H. O.** (2009).  
538 Correlation of cardiac performance with cellular energetic components in the oxygen-deprived  
539 turtle heart. *Am. J. Physiol. Regul. Integr. Comp. Physiol.* **297**, R756-R768.
- 540 **Stewart, P. A.** (1983). Modern quantitative acid-base chemistry. *Can. J. Physiol. Pharmacol.* **61**,  
541 1444-1461.

- 542 **Sun, J., Morgan, M., Shen, R. F., Steenbergen, C. and Murphy, E.** (2007) Preconditioning  
543 results in S-nitrosylation of proteins involved in regulation of mitochondrial energetics and  
544 calcium transport. *Circ. Res.* **101**, 1155-1163.
- 545 **Sun, J. and Murphy, E.** (2010). Protein S-nitrosylation and cardioprotection. *Circ. Res.* **106**, 285-  
546 296.
- 547 **Takahashi, H., Shin, Y., Cho, S. J., Zago, W. M., Nakamura, T., Gu, Z., Ma, Y., Furukawa,**  
548 **H., Liddington, R., Zhang, D. et al.** (2007). Hypoxia enhances S-nitrosylation-mediated  
549 NMDA receptor inhibition via a thiol oxygen sensor motif. *Neuron* **53**, 53-64.
- 550 **Umbrello, M., Dyson, A., Feelisch, M. and Singer, M.** (2013). The key role of nitric oxide in  
551 hypoxia: hypoxic vasodilation and energy supply-demand matching. *Antioxid. Redox Signal.* (in  
552 press) DOI: 10.1089/ars.2012.4979
- 553 **Warren, D. E. and Jackson, D. C.** (2007). Effects of temperature on anoxic submergence: skeletal  
554 buffering, lactate distribution, and glycogen utilization in the turtle, *Trachemys scripta*. *Am. J.*  
555 *Physiol. Regul. Integr. Comp. Physiol.* **293**, R458-R467.
- 556 **Webb, A., Bond, R., McLean, P., Uppal, R., Benjamin, N. and Ahluwalia, A.** (2004). Reduction  
557 of nitrite to nitric oxide during ischemia protects against myocardial ischemia-reperfusion  
558 damage. *Proc. Natl. Acad. Sci. U S A* **101**, 13683-13688.
- 559 **Willmore, W. G. and Storey, K. B.** (1997a). Antioxidant systems and anoxia tolerance in  
560 freshwater turtle *Trachemys scripta elegans*. *Mol. Cell. Biochem.* **170**, 177-185.
- 561 **Willmore, W. G. and Storey, K. B.** (1997b). Glutathione systems and anoxia tolerance in turtles.  
562 *Am. J. Physiol.* **273**, R219-R225.
- 563 **Wu, K. K. and Thiagarajan, P.** (1996). Role of endothelium in thrombosis and hemostasis. *Annu.*  
564 *Rev. Med.* **47**, 315-331.
- 565 **Yang, B. K., Vivas, E. X., Reiter, C. D. and Gladwin, M. T.** (2003). Methodologies for the  
566 sensitive and specific measurement of S-nitrosothiols, iron-nitrosyls, and nitrite in biological  
567 samples. *Free Radic. Res.* **37**, 1-10.

**Figure legends**

Fig. 1. Plasma nitric oxide (NO) metabolites in red-eared slider turtles under normoxic conditions (control), after 9 days of anoxia (9dA), after 9 days anoxia with subsequent 1 h reoxygenation (1hR), and after 9 days of anoxia with subsequent 24 h reoxygenation (24hR). The panels depict concentrations of A: nitrite; B: S-nitroso compounds (SNO); C: iron-nitrosyl and N-nitroso compounds (FeNO+NNO); D: nitrate. Values are means + s.e.m. and  $n = 7$  (control) or 6 (9dA, 1hR and 24hR) in each group. Different letters at bars indicate a significant difference between groups ( $P < 0.05$ ).

Fig. 2. Red blood cell (RBC) concentrations of nitrite (A), SNO (B), FeNO+NNO (C), and nitrate (D) in red-eared slider turtles subjected to normoxia (control), anoxia (9dA), and anoxia with subsequent reoxygenation (1hR and 24hR). Other details as in Fig. 1.

Fig. 3. Heart ventricle concentrations of nitrite (A), SNO (B), FeNO+NNO (C), and nitrate (D) in red-eared slider turtles subjected to normoxia (control), anoxia (9dA), and anoxia with subsequent reoxygenation (1hR and 24hR). The values were determined on a wet weight basis and are shown as absolute concentrations in  $\mu\text{mol l}^{-1}$ , assuming a tissue density of  $1\text{ kg l}^{-1}$ . Other details as in Fig. 1.

Fig. 4. Brain concentrations of nitrite (A), SNO+FeNO+NNO (B), and nitrate (C) in red-eared slider turtles subjected to normoxia (control), anoxia (9dA), and anoxia with subsequent reoxygenation (1hR and 24hR).

Fig. 5. Liver concentrations of nitrite (A), SNO (B), FeNO+NNO (C), and nitrate (D) in red-eared slider turtles subjected to normoxia (control), anoxia (9dA), and anoxia with subsequent reoxygenation (1hR and 24hR). Other details as in Fig. 1.

Fig. 6. Skeletal muscle (pectoral muscle) concentrations of nitrite (A), SNO (B), FeNO+NNO (C), and nitrate (D) in red-eared slider turtles subjected to normoxia (control), anoxia (9dA), and anoxia with subsequent reoxygenation (1hR and 24hR). Other details as in Fig. 1.

598 Fig 7. Glutathione concentrations in plasma (A), heart (B) and liver (C) of red-eared slider turtles  
599 subjected to normoxia (control), anoxia (9dA), and anoxia with subsequent reoxygenation (1hR and  
600 24hR).

601

602 Fig. 8. Plasma concentrations of anions (panel A; lactate and Cl<sup>-</sup>) and cations (panel B; Ca<sup>2+</sup>, Mg<sup>2+</sup>,  
603 K<sup>+</sup> and Na<sup>+</sup>) in red-eared slider turtles subjected to normoxia (control), anoxia (9dA), and anoxia  
604 with subsequent reoxygenation (1hR and 24hR). Values are stacked to reveal the sum of anions (A)  
605 and the sum of cations (B). The strong ion difference (SID) is shown in panel C. Values are means  
606 + s.e.m. and the letter statistics (as explained in legend to Fig. 1) refer to lactate (panel A) and SID  
607 (panel C). Statistics for other electrolytes are mentioned in the text.

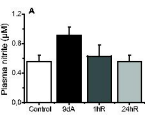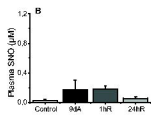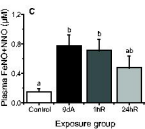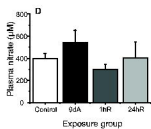

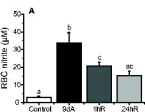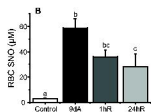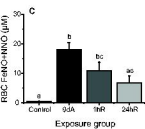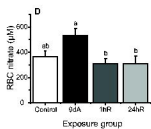

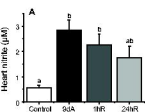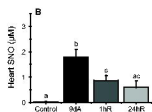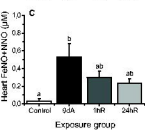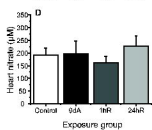



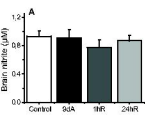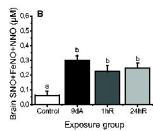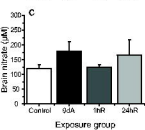

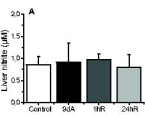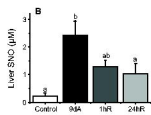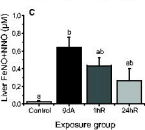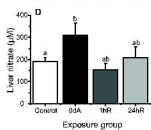

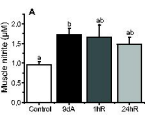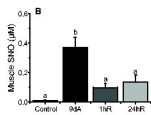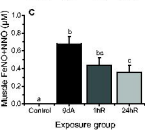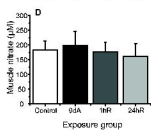

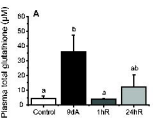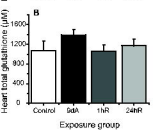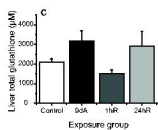

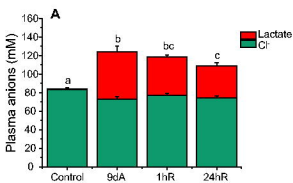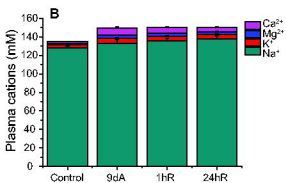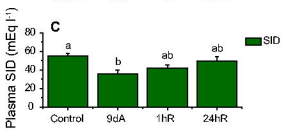

Source: https://cob.silverchair.com/jeb/article-pdf/doi/10.1242/jeb.093179/2037568/jeb_093179.pdf
